# Supplementary material
Source: MDPI journal article supplement (https://www.mdpi.com/2073-4441/11/4/671)
Supplement: s1 [file s1]

**Table S1.** Biological bands/ecological categories for interpreting Average Score per Taxa (ASPT) from TARISS.

| <b>Ecological Band</b> | <b>Water Category</b> | <b>Range of ASPT</b> | <b>Description</b>                                                                                                                                        |
|------------------------|-----------------------|----------------------|-----------------------------------------------------------------------------------------------------------------------------------------------------------|
| <b>A</b>               | Very good (Natural)   | Greater than 7       | No or negligible modification (relatively little human impact)                                                                                            |
| <b>B</b>               | Good                  | 6–6.9                | Biodiversity and integrity largely intact (some human-related disturbance but ecosystems essentially in good state)                                       |
| <b>C</b>               | Fair                  | 5.0–5.9              | Sensitive species may be lost, with tolerant or opportunistic species dominating (Moderately modified)                                                    |
| <b>D</b>               | Poor                  | 4.0–4.9              | Mostly only tolerant species present; alien species invasion; disrupted population dynamics; species are often diseased (Largely modified)                |
| <b>E</b>               | Very poor             | less than 3.9        | River has undergone critical modification; almost complete loss of natural habitat and indigenous species with severe alien invasion (seriously modified) |

Modified from Kaaya [47] and Dallas and Day [46].

The physical-chemical water parameter varied between sampling sites across the streams (Table S2 and Table S3). Mean dissolved oxygen (DO) was lower at Sululu ( $4.37 \pm 0.20$  mg/L), and higher for other streams. Mean EC and turbidity were higher at Sululu ( $44.65 \pm 0.60$   $\mu$ S/cm,  $37.32 \pm 4.60$  NTU) while lower turbidity was found at Mkula ( $12.32 \pm 1.84$  NTU). Nutrients analysis revealed low concentrations of  $\text{NH}_4^+$ -N and  $\text{NO}_3^-$ -N at all streams, with highest concentrations of  $\text{NH}_4^+$ -N and  $\text{NO}_3^-$ -N at Sululu.

Across sites (Table S3), higher DO was found at the sampling sites upstream irrigation schemes ( $7.27 \pm 0.31$  mg/L for Site 1 and  $7.17 \pm 0.36$  mg/L for Site 2) relative to sites downstream irrigation schemes ( $6.50 \pm 0.34$  mg/L at Site 4 and  $6.42 \pm 0.37$  mg/L at Site 5). Electrical conductivity and turbidity were higher at the downstream irrigation sampling Site 4 and Site 5. Higher mean concentration of  $\text{NH}_4^+$ -N, and  $\text{NO}_3^-$ -N were found downstream irrigation; however, there was no difference of  $\text{PO}_4^{3-}$ -P among sampling.

**Table S2.** Physical-chemical water quality parameters between sampling sites and among streams their interactions in Kilombero Valley, Tanzania.

| Factor        | Dependent Variable               | df | Mean square | F        | P value |
|---------------|----------------------------------|----|-------------|----------|---------|
| Stream        | pH                               | 4  | 0.446       | 12.640   | 0.000   |
|               | DO                               | 4  | 30.777      | 1282.864 | 0.000   |
|               | EC                               | 4  | 98.483      | 6.220    | 0.000   |
|               | Turbidity                        | 4  | 3670.102    | 728.253  | 0.000   |
|               | Temp                             | 4  | 19.915      | 1033.032 | 0.000   |
|               | NH <sub>4</sub> <sup>+</sup> -N  | 4  | 4.553       | 54.859   | 0.000   |
|               | NO <sub>3</sub> <sup>-</sup> -N  | 4  | 0.430       | 34.187   | 0.000   |
|               | PO <sub>4</sub> <sup>3-</sup> -P | 4  | 7.580E-06   | 0.791    | 0.537ns |
| Site          | pH                               | 4  | 0.220       | 6.241    | 0.000   |
|               | DO                               | 4  | 2.176       | 90.716   | 0.000   |
|               | EC                               | 4  | 157.465     | 9.945    | 0.000   |
|               | Turbidity                        | 4  | 641.298     | 127.252  | 0.000   |
|               | Temp                             | 4  | 12.636      | 655.425  | 0.000   |
|               | NH <sub>4</sub> <sup>+</sup> -N  | 4  | 0.951       | 11.458   | 0.000   |
|               | NO <sub>3</sub> <sup>-</sup> -N  | 4  | 0.094       | 7.446    | 0.000   |
|               | PO <sub>4</sub> <sup>3-</sup> -P | 4  | 3.013E-06   | 0.314    | 0.867ns |
| Stream * Site | pH                               | 16 | 0.253       | 7.163    | 0.000   |
|               | DO                               | 16 | 0.222       | 9.261    | 0.000   |
|               | EC                               | 16 | 35.901      | 2.267    | 0.014   |
|               | Turbidity                        | 16 | 265.513     | 52.685   | 0.000   |
|               | Temp                             | 16 | 11.887      | 616.569  | 0.000   |
|               | NH <sub>4</sub> <sup>+</sup> -N  | 16 | 0.236       | 2.843    | 0.002   |
|               | NO <sub>3</sub> <sup>-</sup> -N  | 16 | 0.032       | 2.527    | 0.006   |
|               | PO <sub>4</sub> <sup>3-</sup> -P | 16 | 5.630E-06   | 0.587    | 0.879ns |

**Table S3.** Physical-chemical parameters (mean  $\pm$ SE); dissolved oxygen (DO), pH, electrical conductivity (EC), turbidity, temperature, ammonium-N, nitrate-N, and phosphate-water quality parameters of different streams and sampling sites in Kilombero Valley: MS—Msolwa, MK—Mkula, NJ—Njage, SL—Sululu, KT—Kidete stream (least impacted).

| Stream/<br>Site | pH                            | DO<br>(mg/L)                 | EC ( $\mu$ S/cm)               | Turbidity<br>NTU              | Temp ( $^{\circ}$ C)           | NH <sub>4</sub> <sup>+</sup> -N<br>(mg/L) | NO <sub>3</sub> <sup>-</sup> -N<br>(mg/L) | PO <sub>4</sub> <sup>3-</sup> -P<br>(mg/L) |
|-----------------|-------------------------------|------------------------------|--------------------------------|-------------------------------|--------------------------------|-------------------------------------------|-------------------------------------------|--------------------------------------------|
| MS              | 7.29 $\pm$ 0.14 <sup>a</sup>  | 6.84 $\pm$ 0.30 <sup>a</sup> | 40.04 $\pm$ 2.42 <sup>a</sup>  | 47.33 $\pm$ 8.82 <sup>a</sup> | 20.09 $\pm$ 0.14 <sup>a</sup>  | 3.21 $\pm$ 0.14 <sup>a</sup>              | 0.77 $\pm$ 0.04 <sup>a</sup>              | 0.082 $\pm$ 0.001                          |
| MK              | 7.59 $\pm$ 0.12 <sup>bc</sup> | 7.61 $\pm$ 0.13 <sup>b</sup> | 42.83 $\pm$ 2.07 <sup>ab</sup> | 12.32 $\pm$ 1.84 <sup>b</sup> | 21.26 $\pm$ 0.61 <sup>b</sup>  | 2.84 $\pm$ 0.10 <sup>b</sup>              | 1.03 $\pm$ 0.04 <sup>bc</sup>             | 0.082 $\pm$ 0.001                          |
| NJ              | 7.18 $\pm$ 0.07 <sup>a</sup>  | 7.46 $\pm$ 0.14 <sup>b</sup> | 42.32 $\pm$ 2.68 <sup>a</sup>  | 22.22 $\pm$ 2.04 <sup>c</sup> | 19.79 $\pm$ 0.19 <sup>c</sup>  | 2.77 $\pm$ 0.10 <sup>b</sup>              | 0.78 $\pm$ 0.03 <sup>a</sup>              | 0.083 $\pm$ 0.001                          |
| SL              | 7.54 $\pm$ 0.20 <sup>c</sup>  | 4.37 $\pm$ 0.20 <sup>c</sup> | 44.65 $\pm$ 0.60 <sup>b</sup>  | 37.32 $\pm$ 4.60 <sup>d</sup> | 22.57 $\pm$ 1.85 <sup>d</sup>  | 3.33 $\pm$ 0.09 <sup>a</sup>              | 0.98 $\pm$ 0.05 <sup>c</sup>              | 0.083 $\pm$ 0.001                          |
| KT              | 7.32 $\pm$ 0.40 <sup>a</sup>  | 7.91 $\pm$ 0.19 <sup>d</sup> | 38.07 $\pm$ 3.18 <sup>ac</sup> | 12.06 $\pm$ 2.67 <sup>b</sup> | 20.12 $\pm$ 0.41 <sup>e</sup>  | 1.93 $\pm$ 0.07 <sup>c</sup>              | 0.61 $\pm$ 0.02 <sup>d</sup>              | 0.0812 $\pm$ 0.001                         |
| Site1           | 7.35 $\pm$ 0.05 <sup>a</sup>  | 7.27 $\pm$ 0.31 <sup>a</sup> | 37.14 $\pm$ 1.55 <sup>a</sup>  | 19.74 $\pm$ 1.84 <sup>a</sup> | 19.70 $\pm$ 0.095 <sup>a</sup> | 2.50 $\pm$ 0.15 <sup>a</sup>              | 0.71 $\pm$ 0.05 <sup>a</sup>              | 0.082 $\pm$ 0.0008                         |
| Site2           | 7.20 $\pm$ 0.08 <sup>ab</sup> | 7.17 $\pm$ 0.36 <sup>a</sup> | 40.21 $\pm$ 1.43 <sup>a</sup>  | 20.21 $\pm$ 3.06 <sup>a</sup> | 20.01 $\pm$ 0.08 <sup>b</sup>  | 2.64 $\pm$ 0.16 <sup>ac</sup>             | 0.84 $\pm$ 0.04 <sup>b</sup>              | 0.082 $\pm$ 0.0006                         |
| Site3           | 7.41 $\pm$ 0.08 <sup>ac</sup> | 6.84 $\pm$ 0.36 <sup>b</sup> | 41.22 $\pm$ 1.28 <sup>a</sup>  | 25.80 $\pm$ 4.78 <sup>b</sup> | 21.97 $\pm$ 1.04 <sup>c</sup>  | 3.05 $\pm$ 0.15 <sup>bc</sup>             | 0.82 $\pm$ 0.03 <sup>ab</sup>             | 0.081 $\pm$ 0.0008                         |
| Site4           | 7.44 $\pm$ 0.09 <sup>ac</sup> | 6.50 $\pm$ 0.34 <sup>c</sup> | 45.43 $\pm$ 0.81 <sup>b</sup>  | 30.84 $\pm$ 5.26 <sup>c</sup> | 20.94 $\pm$ 0.26 <sup>d</sup>  | 2.82 $\pm$ 0.12 <sup>c</sup>              | 0.91 $\pm$ 0.06 <sup>b</sup>              | 0.081 $\pm$ 0.0008                         |
| Site5           | 7.52 $\pm$ 0.10 <sup>ac</sup> | 6.42 $\pm$ 0.37 <sup>c</sup> | 43.91 $\pm$ 1.28 <sup>b</sup>  | 34.67 $\pm$ 5.30 <sup>d</sup> | 21.21 $\pm$ 0.34 <sup>e</sup>  | 3.07 $\pm$ 0.20 <sup>c</sup>              | 0.90 $\pm$ 0.07 <sup>b</sup>              | 0.083 $\pm$ 0.001                          |

**Table 4.** List of macroinvertebrate taxa and their distribution for sites of different streams in Kilombero Valley, Tanzania.

| Taxonomic Group                                | Sensitivity Score | MS1 | MS2 | MS3 | MS4 | MS5 | MK1 | MK2 | MK3 | MK4 | MK5 | NJ1 | NJ2 | NJ3 | NJ4 | NJ5 | SL1 | SL2 | SL3 | SL4 | SL5 | KT1 | KT2 | KT3 | KT4 | KT5 | Abundance (%) |
|------------------------------------------------|-------------------|-----|-----|-----|-----|-----|-----|-----|-----|-----|-----|-----|-----|-----|-----|-----|-----|-----|-----|-----|-----|-----|-----|-----|-----|-----|---------------|
| <b>Annelida</b>                                |                   |     |     |     |     |     |     |     |     |     |     |     |     |     |     |     |     |     |     |     |     |     |     |     |     |     | <b>1</b>      |
| Hirudinea                                      | 1                 | 0   | 0   | 0   | 0   | ✓   | 0   | 0   | ✓   | 0   | ✓   | 0   | 0   | ✓   | ✓   | 0   | ✓   | ✓   | ✓   | ✓   | ✓   | 0   | 0   | 0   | 0   | 0   | 1             |
| <b>Crustacea</b>                               |                   |     |     |     |     |     |     |     |     |     |     |     |     |     |     |     |     |     |     |     |     |     |     |     |     |     | <b>8</b>      |
| Potamonautiae                                  | 3                 | ✓   | ✓   | 0   | 0   | 0   | ✓   | ✓   | ✓   | 0   | 0   | ✓   | 0   | 0   | ✓   | 0   | 0   | 0   | 0   | ✓   | 0   | ✓   | ✓   | ✓   | ✓   | 0   | 3             |
| Atyidae                                        | 8                 | 0   | 0   | 0   | 0   | 0   | ✓   | 0   | 0   | 0   | 0   | ✓   | ✓   | 0   | 0   | 0   | ✓   | ✓   | 0   | 0   | 0   | 0   | 0   | 0   | ✓   | ✓   | 5             |
| <b>Ephemeroptera (mayflies)</b>                |                   |     |     |     |     |     |     |     |     |     |     |     |     |     |     |     |     |     |     |     |     |     |     |     |     |     | <b>13</b>     |
| Baetidae >2 sp                                 | 12                | ✓   | 0   | ✓   | ✓   | 0   | ✓   | ✓   | 0   | 0   | 0   | ✓   | 0   | 0   | 0   | ✓   | 0   | 0   | 0   | 0   | 0   | ✓   | ✓   | ✓   | ✓   | ✓   | 4             |
| Caenidae                                       | 6                 | 0   | 0   | 0   | 0   | 0   | 0   | 0   | 0   | 0   | 0   | 0   | 0   | 0   | 0   | ✓   | 0   | 0   | 0   | 0   | ✓   | 0   | 0   | ✓   | 0   | 0   | 1             |
| Ephemerythidae                                 | 9                 | ✓   | 0   | ✓   | ✓   | ✓   | ✓   | ✓   | ✓   | ✓   | 0   | ✓   | 0   | 0   | 0   | ✓   | 0   | 0   | 0   | 0   | 1   | 0   | ✓   | 0   | 0   | 0   | 3             |
| Heptageniidae                                  | 13                | ✓   | ✓   | 0   | 0   | 0   | ✓   | ✓   | 0   | 0   | 0   | 0   | 0   | 0   | ✓   | 0   | 0   | 0   | 0   | ✓   | 0   | ✓   | ✓   | 0   | 0   | 0   | 2             |
| Tricorythidae                                  | 9                 | 0   | ✓   | 0   | 0   | 0   | 0   | 0   | 0   | 0   | 0   | ✓   | 0   | 0   | 0   | 0   | 0   | 0   | 0   | 0   | 0   | 0   | ✓   | 6   | 0   | 0   | 1             |
| Oligoneuridae                                  | 15                | 0   | 0   | 0   | 0   | 0   | 0   | 0   | 0   | 0   | 0   | ✓   | 0   | 0   | 0   | 0   | 0   | 0   | 0   | 0   | 0   | ✓   | ✓   | 0   | 0   | 0   | 1             |
| Leptophlebiidae                                | 9                 | 0   | 0   | 0   | 0   | 0   | 0   | 0   | 0   | 0   | 0   | 0   | 0   | 0   | 0   | 0   | 0   | 0   | 0   | 0   | 0   | ✓   | ✓   | ✓   | 0   | 0   | 1             |
| <b>Odonata (dragonflies &amp; damselflies)</b> |                   |     |     |     |     |     |     |     |     |     |     |     |     |     |     |     |     |     |     |     |     |     |     |     |     |     | <b>18</b>     |
| Coenagrionidae                                 | 4                 | 0   | 0   | ✓   | ✓   | 0   | ✓   | 0   | ✓   | ✓   | 0   | 0   | 0   | 0   | ✓   | ✓   | 0   | 0   | 0   | 0   | 0   | 0   | 0   | 0   | 0   | 0   | 2             |
| Chlorocyphidae                                 | 10                | 0   | ✓   | 0   | 0   | 0   | 0   | 0   | 0   | 0   | 0   | 0   | 0   | 0   | ✓   | 0   | 0   | 0   | 0   | 1   | 0   | 0   | ✓   | ✓   | 0   | 0   | 1             |
| Gomphidae                                      | 6                 | ✓   | 0   | ✓   | ✓   | ✓   | ✓   | ✓   | ✓   | ✓   | ✓   | ✓   | ✓   | ✓   | 0   | ✓   | ✓   | ✓   | ✓   | 0   | ✓   | ✓   | ✓   | ✓   | ✓   | ✓   | 9             |
| Cordulidae                                     | 8                 | 0   | 0   | 0   | 0   | 0   | 0   | 0   | 0   | 0   | 0   | 0   | 0   | ✓   | ✓   | ✓   | 0   | 0   | ✓   | ✓   | ✓   | 0   | 0   | 0   | ✓   | ✓   | 2             |
| Libellulidae                                   | 4                 | 0   | 0   | ✓   | ✓   | 0   | 0   | 0   | 0   | ✓   | ✓   | 0   | ✓   | ✓   | ✓   | ✓   | ✓   | ✓   | ✓   | ✓   | ✓   | ✓   | ✓   | ✓   | ✓   | 0   | 5             |
| <b>Hemiptera (bugs)</b>                        |                   |     |     |     |     |     |     |     |     |     |     |     |     |     |     |     |     |     |     |     |     |     |     |     |     |     | <b>24</b>     |
| Nepidae                                        | 3                 | 0   | 0   | 0   | 0   | 0   | 0   | 0   | 0   | ✓   | 0   | 0   | 0   | ✓   | 0   | 0   | 0   | 0   | ✓   | 0   | 0   | 0   | 0   | 0   | 0   | ✓   | 1             |
| Pleidae                                        | 4                 | 0   | 0   | 0   | 0   | 0   | 0   | 0   | 0   | 0   | 0   | 0   | 0   | 0   | 0   | 0   | 0   | 0   | 0   | 0   | 0   | 0   | 0   | 0   | 0   | 0   | 0             |
| Naucoridae                                     | 7                 | 0   | 0   | 0   | ✓   | 0   | 0   | 0   | ✓   | ✓   | 0   | 0   | 0   | ✓   | 0   | ✓   | 0   | 0   | ✓   | 0   | ✓   | ✓   | 0   | 0   | 0   | 0   | 1             |
| Veliidae                                       | 5                 | ✓   | ✓   | ✓   | ✓   | ✓   | ✓   | ✓   | 0   | ✓   | ✓   | ✓   | ✓   | 0   | ✓   | ✓   | 0   | ✓   | 0   | ✓   | ✓   | ✓   | ✓   | ✓   | ✓   | ✓   | 12            |
| Hydrometridae                                  | 6                 | 0   | 0   | ✓   | 0   | 0   | 0   | 0   | ✓   | 0   | 0   | 0   | ✓   | 0   | 0   | 0   | 0   | ✓   | 0   | 0   | 0   | 0   | 0   | 0   | 0   | 0   | 1             |
| Gerridae                                       | 5                 | 0   | 0   | 0   | 0   | ✓   | 0   | 0   | 0   | ✓   | ✓   | ✓   | ✓   | ✓   | ✓   | ✓   | ✓   | ✓   | ✓   | ✓   | ✓   | ✓   | 0   | 0   | ✓   | ✓   | 10            |
| Belostomatidae                                 | 3                 | 0   | 0   | 0   | 0   | ✓   | 0   | 0   | 0   | 0   | 0   | 0   | 0   | 0   | 0   | 0   | 0   | 0   | 0   | 0   | 0   | 0   | 0   | 0   | 0   | 0   | 0             |
| <b>Trichoptera</b>                             |                   |     |     |     |     |     |     |     |     |     |     |     |     |     |     |     |     |     |     |     |     |     |     |     |     |     | <b>10</b>     |
| Philopotamidae                                 | 10                | ✓   | ✓   | 0   | 0   | 0   | ✓   | ✓   | 0   | 0   | 0   | 0   | 0   | 0   | 0   | 0   | 0   | 0   | 0   | 0   | 0   | 0   | 0   | 0   | 0   | 0   | 2             |
| Leptoceridae                                   | 6                 | 0   | 0   | ✓   | 0   | ✓   | 0   | 0   | 0   | 0   | 0   | 0   | 0   | 0   | 0   | 0   | 0   | 0   | 0   | 0   | 0   | 0   | 0   | 0   | 0   | ✓   | 1             |
| Hydropsychidae                                 | 12                | ✓   | ✓   | ✓   | 0   | ✓   | ✓   | ✓   | 0   | 0   | 0   | 0   | 0   | ✓   | 0   | 0   | 0   | 0   | 0   | 0   | 0   | ✓   | ✓   | 0   | 0   | 0   | 7             |
